# Supplementary material
Source: publisher figshare collection journal article supplement (https://acs.figshare.com/ndownloader/files/4253689)
Supplement: Supplementary file 1 [file 4253689]

Supporting Information Available

**Supplementary Figure 1:**  $^1\text{H}$ -NMR spectrum of the PEKC polymerized at 120°C for 24 hours, showing evidence of degradation due to pyrolysis in the way of peaks in the alkene region at 5.7 ppm, 5.9 ppm, 6.3 ppm, which indicate the unsaturated end group formed, and at 12 ppm, corresponding to the carboxylic acid formed, as a result of pyrolysis.

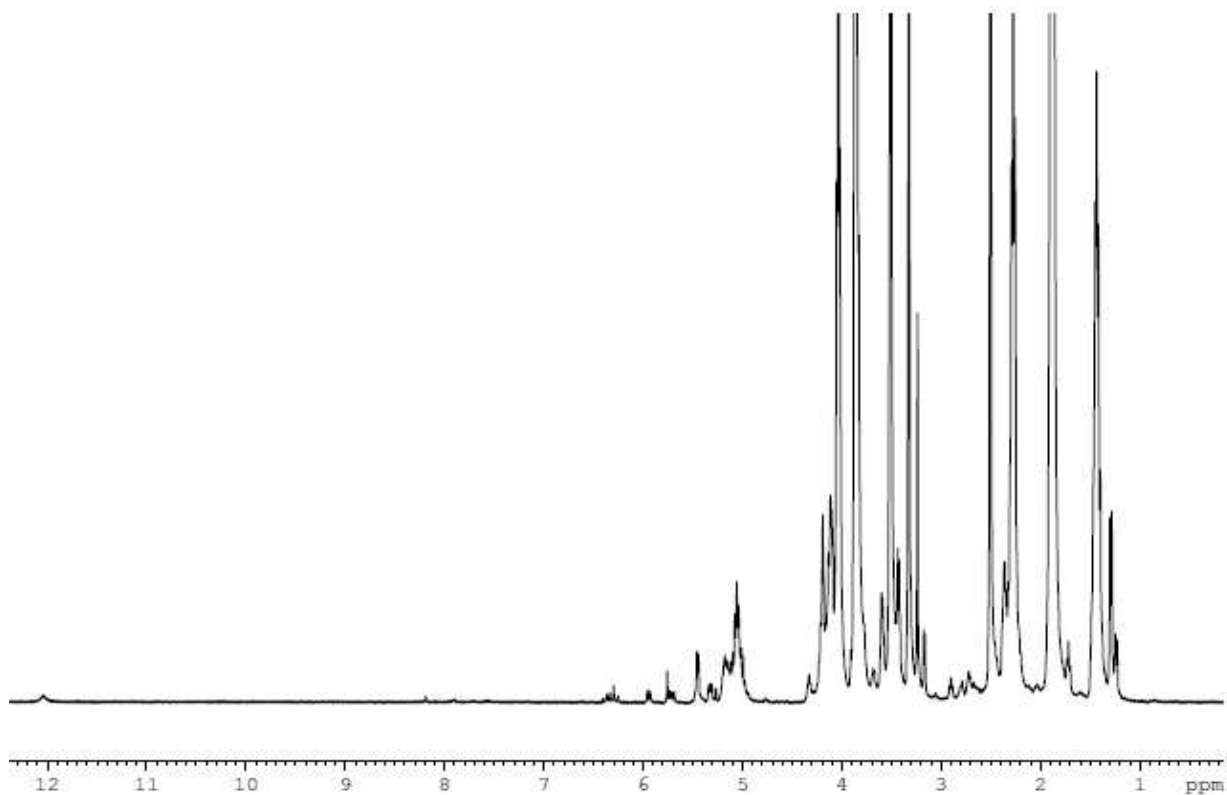

**Supplementary Figure 2:** Photograph of the polymers in buffer at 3 weeks showing the opaque colour of the layer of polymer directly in contact with the buffer and the yellow and clear colour of the layer of polymer not directly in contact with the buffer.

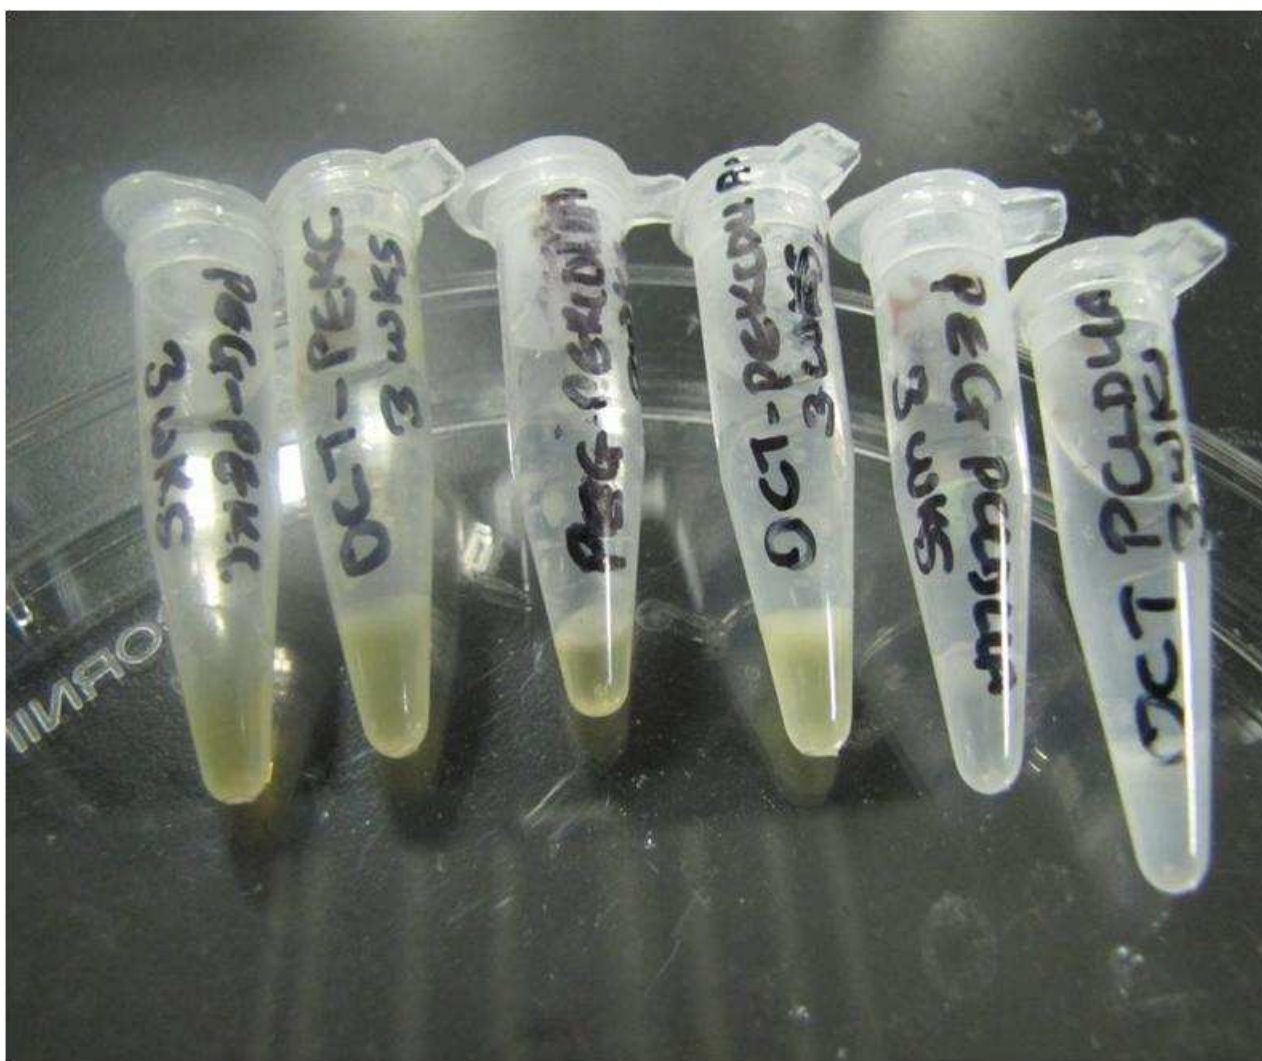

**Supplementary Figure 3:**  $^1\text{H}$ -NMR spectrum of purified PEG-PEKCDLLA, PEG-PEKC and MPEG 350 in DMSO showing evidence of the absence of unreacted monomer and initiator.

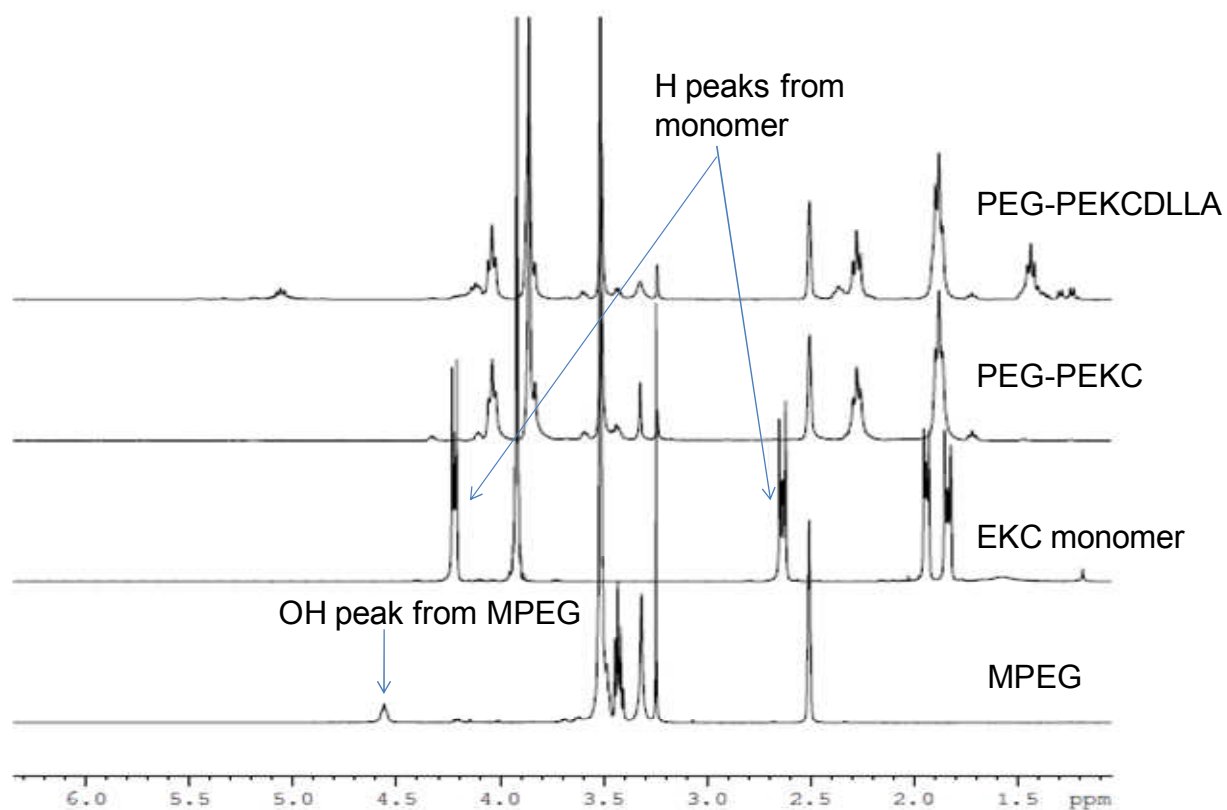

**Supplementary Figure 4:**  $^1\text{H}$ -NMR spectra of A) PEG-PCLDLLA B) PEG-PEKCDLLA during *in vitro* degradation for 24 weeks. The spectra show the gradual loss of the MPEG portion of the polymers by hydrolysis, indicated by the decrease in the methyl peak of the MPEG at 3.23 ppm.

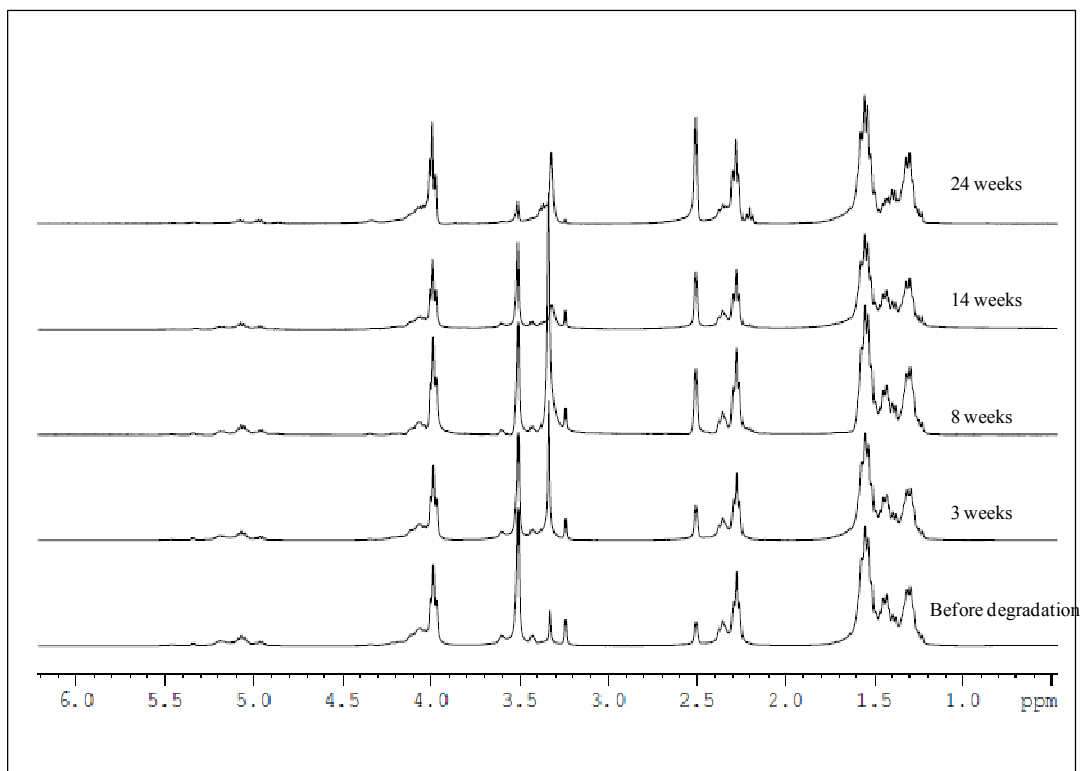

A

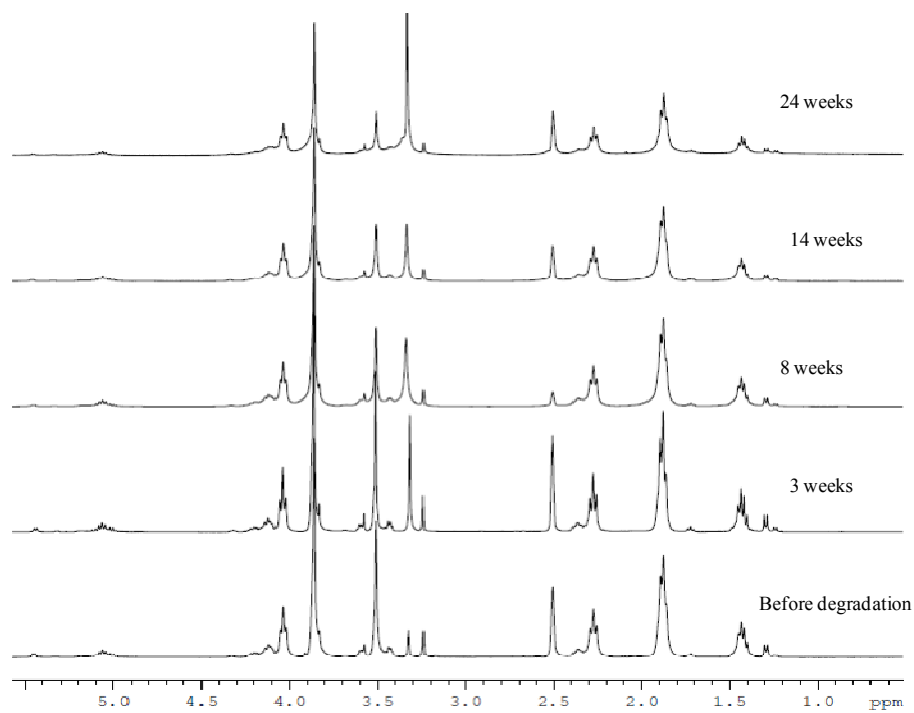

B

Supplemental Table 1: Wet and dry glass transition temperatures (°C) of the EKC containing polymers during degradation.

| Time<br>(week) | OCT-PEKC |     | PEG-PEKC |     | OCT-<br>PEKCDLLA |     | PEG-<br>PEKCDLLA |     |
|----------------|----------|-----|----------|-----|------------------|-----|------------------|-----|
|                | wet      | dry | wet      | dry | wet              | dry | wet              | dry |
| 3              | -34      | -30 | -35      | -32 | -29              | -24 | -27              | -21 |
| 8              | -34      | -29 | -34      | -30 | -33              | -24 | -27              | -21 |
| 14             | -35      | -30 | -34      | -30 | -31              | -26 | -24              | -19 |
| 24             | -35      | -31 | -35      | -30 | -29              | -26 | -25              | -20 |

Supplemental Table 2: Wet and dry glass transition temperatures (°C) of the CL containing polymers during degradation.

| Time<br>(week) | OCT-PCLDLLA |     | PEG-PCLDLLA |     |
|----------------|-------------|-----|-------------|-----|
|                | wet         | dry | wet         | dry |
| 3              | -56         | -53 | -55         | -53 |
| 8              | -57         | -55 | -56         | -55 |
| 14             | -61         | -55 | -57         | -54 |
| 24             | -67         | -65 | -63         | -58 |
